# Supplementary material for: Single-Cell Analysis Suggests that Ongoing Affinity Maturation Drives the Emergence of Pemphigus Vulgaris Autoimmune Disease
Source: PubMed Central journal article supplement (PMC6684256; doi:10.1016/j.celrep.2019.06.066), 2019-07-23
Supplement: NIHMS1535565-supplement-1.pdf [file NIHMS1535565-supplement-1.pdf]

**Cell Reports, Volume 28**

## **Supplemental Information**

**Single-Cell Analysis Suggests that Ongoing Affinity**

**Maturation Drives the Emergence of Pemphigus**

**Vulgaris Autoimmune Disease**

**Alice Cho, Amber L. Caldara, Nina A. Ran, Zach Menne, Robert C. Kauffman, Maurizio Affer, Alexandra Llovet, Carson Norwood, Aaron Scanlan, Grace Mantus, Bridget Bradley, Stephanie Zimmer, Thomas Schmidt, Michael Hertl, Aimee S. Payne, Ron Feldman, Andrew P. Kowalczyk, and Jens Wrämmert**

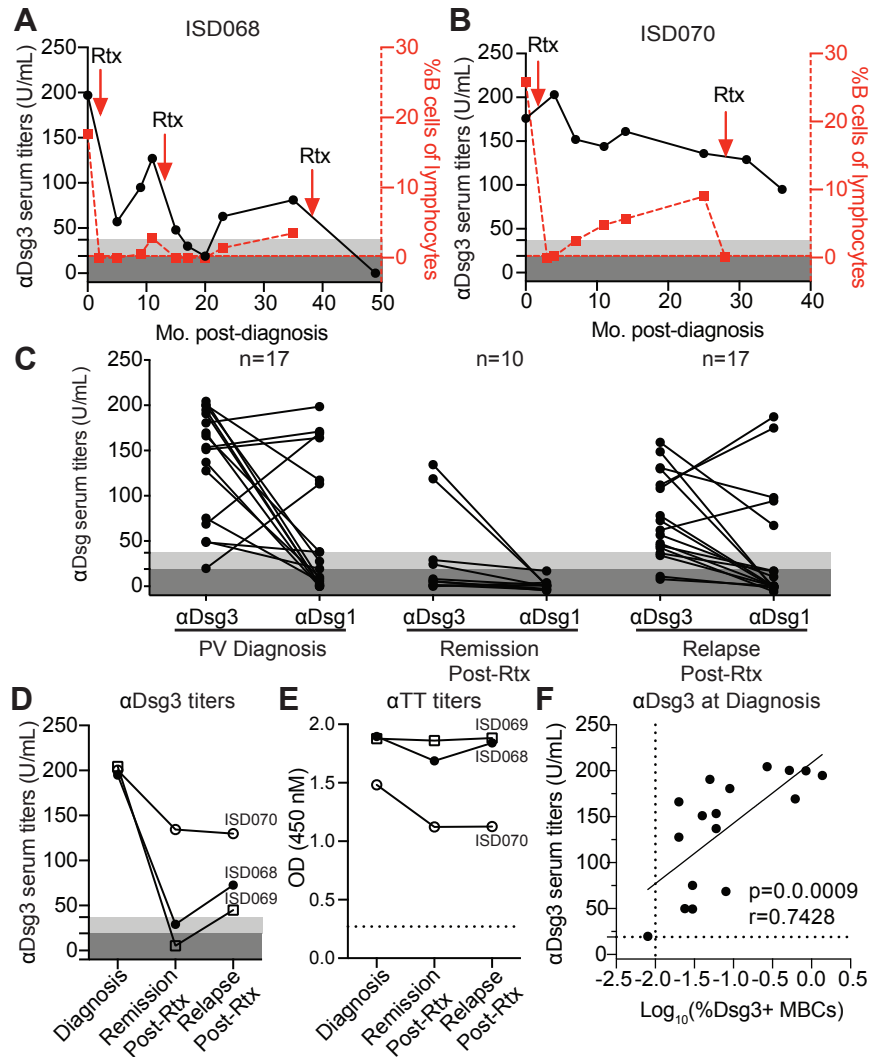

**Figure S1. Related to Figure 1. Kinetics of serum antibody titers before and after treatment with B cell depletive therapy.** (A) The average kinetics of anti-Dsg3 serum titers (left Y-axis, black line) and peripheral blood CD19+ B cells (right Y-axis, red line) for most PV patients after treatment with Rituximab (Rtx) therapy. Cut-off values for ELISA were determined by manufacturer's suggestion (dark grey = negative, light grey = indeterminate). Red dotted line represents limit of detection for CD19+ B cells in circulation. (B) A smaller number of patients who are in clinical remission do not have a complete decrease of anti-Dsg3 serum titers in response to Rituximab-mediated therapy, despite showing complete depletion of B cells in the periphery. (C) Anti-Dsg1 serum titers were found only in a subset of PV patients, specifically at the time of diagnosis and relapse post-Rtx, but undetectable in patients in remission. When tracking serum titers specifically in PV patients sampled longitudinally at multiple time points (D) anti-Dsg3 serum titers decreased dramatically after Rituximab-treatment while (E) anti-tetanus toxoid (TT) titers did not significantly change over time. Anti-TT titers are shown as the final OD reading of serum diluted at 1:200. Dotted-line represents the cut-off value determined by the background signal in a negative HC serum. Data is representative of two individual experimental repeats. (F) There was a significant positive correlation between frequency of Dsg3-specific MBCs and anti-Dsg3 serum titers. Dotted lines represent cut-off values for either the ELISA or MBC assay. A spearman correlation was used to analyze this data.

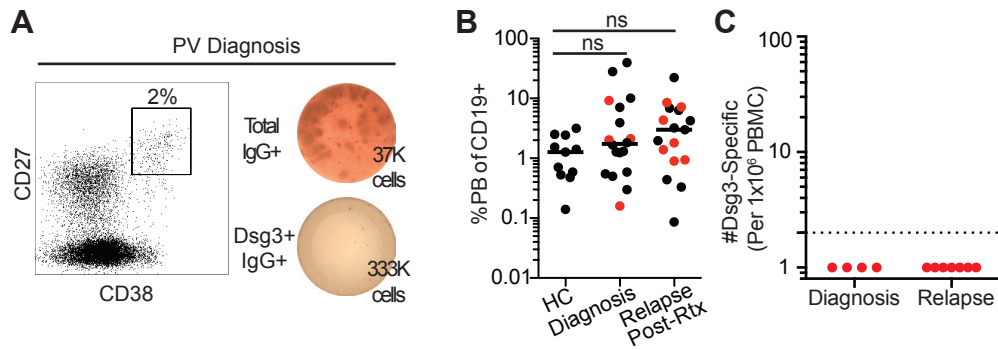

**Figure S2. Related to Figure 1. No Dsg3-specific circulating plasmablasts are detected in symptomatic PV patients.** (A) A representative flow plot of plasmablasts detected in peripheral blood (gated on CD3-CD19+ lymphocytes) and an ELISPOT assay, showing a single dilution of titrated PBMCs probed for total IgG and Dsg3-specific IgG antibody-secreting cells from a PV patient at the time of diagnosis. (B) Frequency of plasmablasts does not differ between HC and patients at diagnosis or relapse. Red dots represent patients tested by ELISPOT for Dsg3-specific plasmablasts. (C) Absence of detectable Dsg3-specific circulating plasmablasts in patients presenting with active PV disease. Dotted line represents limit of detection of the ELISPOT assay at 3 antibody secreting cells per  $1 \times 10^6$  PBMCs. A one-way ANOVA was used to analyze this data.

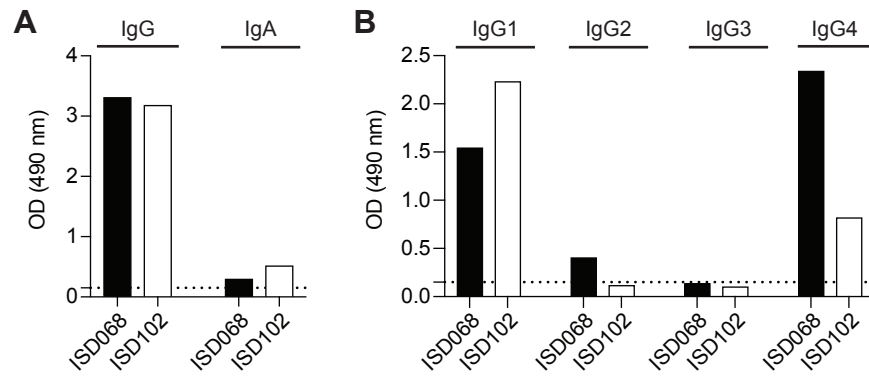

**Figure S3. Related to Figure 2. Dsg3-specific serum antibodies were primarily IgG1 and IgG4 isotype.** An ELISA was used to determine isotype usage of Dsg3-specific serum antibodies from patients ISD068 and ISD102. Shown is the OD reading of serum diluted at 1:100. (A) Dsg3-specific serum responses are predominantly IgG, although some IgA was detected in both patients. (B) ELISA using IgG subclass reagents show that the Dsg3-specific responses are dominated by IgG1 and IgG4 subclass usage. Little to no IgG2 or IgG3 was detected in either of the patients. Dotted line represents cut-off value determined by the background signal detected in HC serum. Data is representative of two individual experimental repeats.

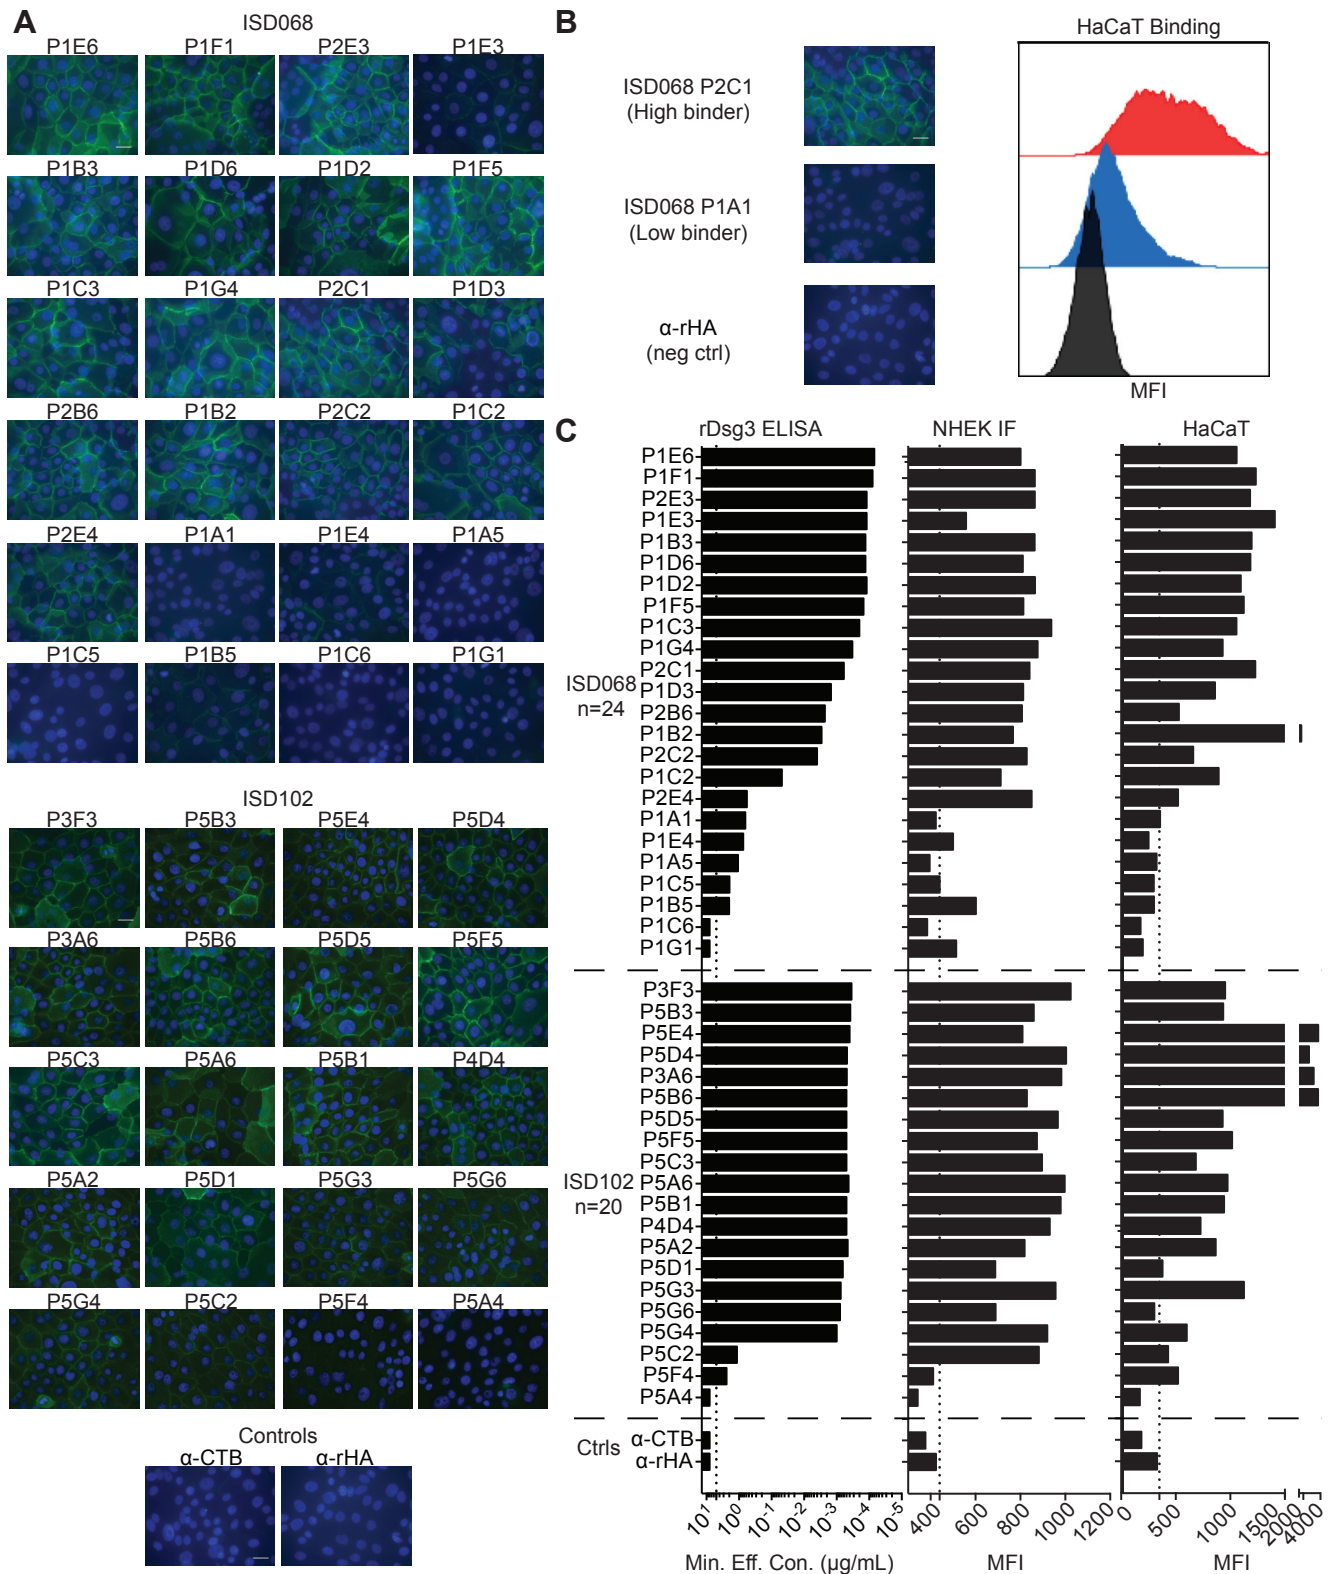

**Figure S4. Related to Figure 2. Assessment of mAbs binding to Dsg3 expressed on cell surface.** Binding of mAbs to Dsg3 was determined using (A) immunofluorescent staining of HK cells (primary cells line of human keratinocytes) and (B) flow cytometry-based assay of staining HaCaT cells (immortalized cell line of human keratinocytes), shown as histograms. Representative images from panel S4A are used in panel S4B to provide a direct, side-by-side comparison between the two different methods. (C) Summary data comparing binding measured via ELISA, IF, and flow cytometry shows that there is a range of binding activity of mAbs towards Dsg3. Representative data of two individual experimental repeats is shown. White scale bar in A, 25  $\mu$ m. Dotted line for MFI represents cut-off value for a negative signal.

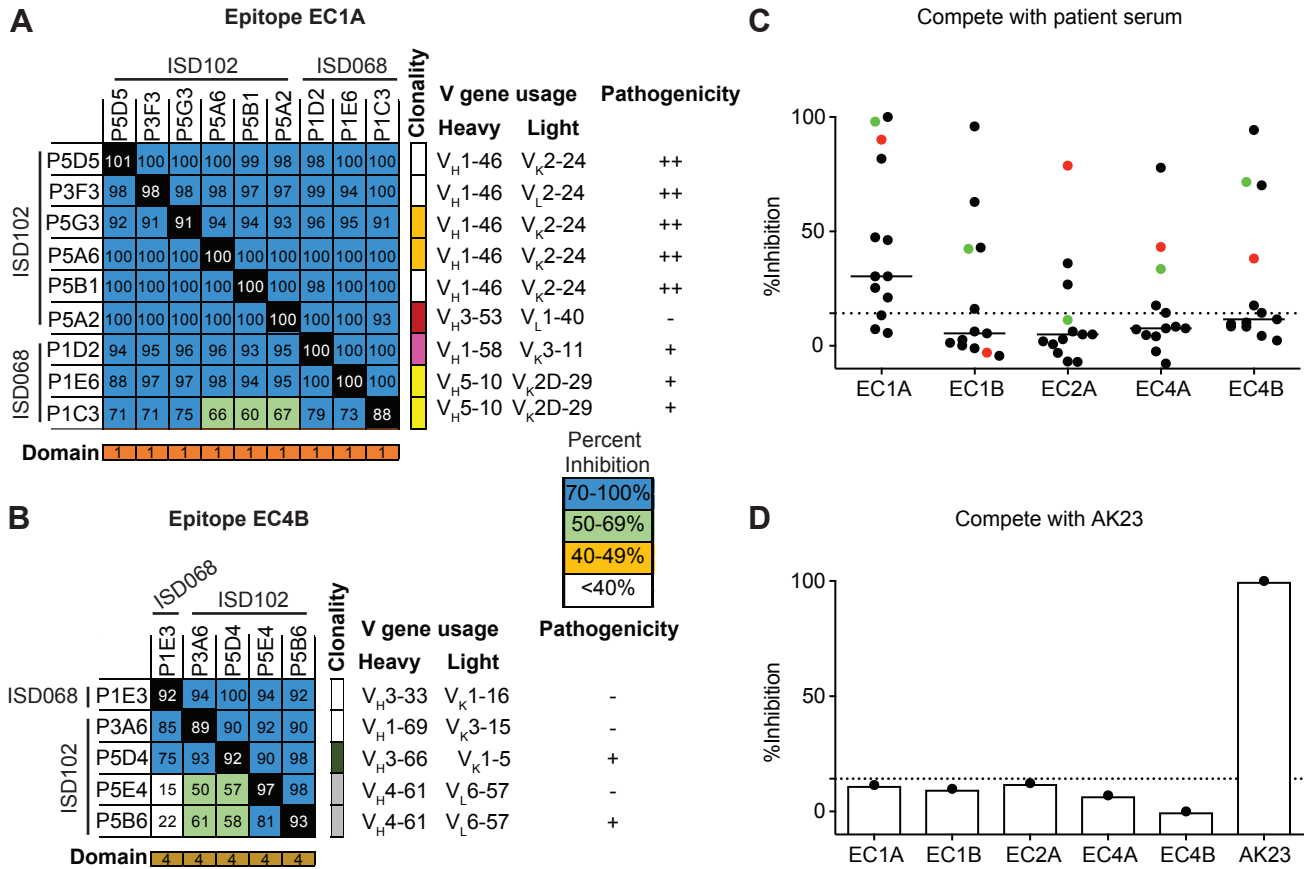

**Figure S5. Related to Figure 4. Similar sterically-distinct epitopes detected by flow cytometry-based blocking assay were representative of other PV patients at diagnosis.** The flow-based blocking assay was also used to define overlapping epitopes between patients ISD068 and ISD102. Antibodies targeting (A) epitope EC1A and (B) epitope EC4B could be detected in both patients. (C) A blocking ELISA was performed by using 13 PV serum from time of diagnosis to block binding of 5 different biotinylated mAbs to Dsg3, each mAb representative of the 5 detected epitopes described in Figure 4. While EC1A epitope was most commonly detected in all patients, the other 4 epitopes were targeted as well. Red dot: patient ISD068; Green dot: patient ISD102. (D) A blocking ELISA was also used to determine if the 5 detected epitopes bound to the same epitope as AK23, an EC1-specific pathogenic mouse-derived mAb (Tsunoda et al., 2003). Interestingly, none of the 5 described epitopes targeted by the human MBC-derived mAbs bound to the same epitopes as the EC1-specific AK23, suggesting that preferred immunodominant epitopes are different for humans mAbs versus mouse mAbs. Representative data of two individual experimental repeats is shown. Dotted line represents cut-off value for positive inhibition, as determined by the mean of inhibition of 9 HC sera plus 2 SD.

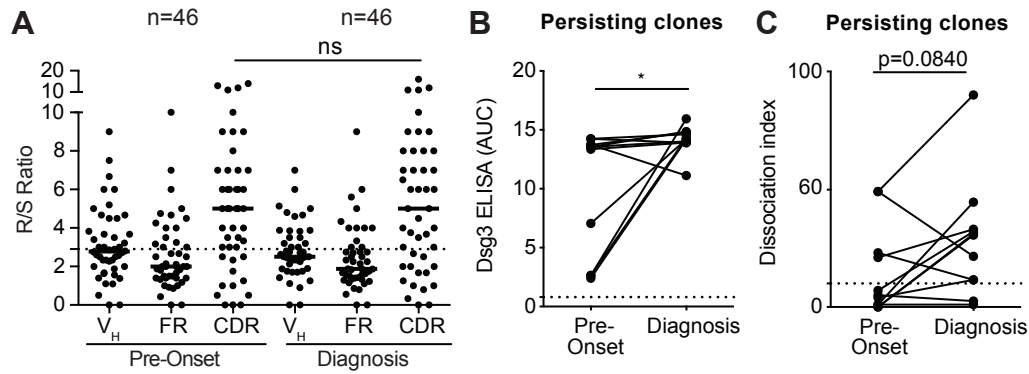

**Figure S6. Related to Figure 5. Antigen selection and ongoing affinity maturation of Dsg3-specific memory B cells.** (A) R/S ratios were above 2.9 in the CDR at both pre-onset and diagnosis, indicating that antigenic selection is an ongoing process occurring continuously during disease development. When comparing only mAbs derived from persisting clones (MBCs from the same clonal family found at both pre-onset and diagnosis time points), (B) there was a significant increase in relative affinity of mAbs for Dsg3 and (C) a trend towards an increase in pathogenicity from pre-onset to diagnosis. A Mann-Whitney U test or Wilcoxon paired T-test was used where appropriate. \* =  $P \leq 0.05$

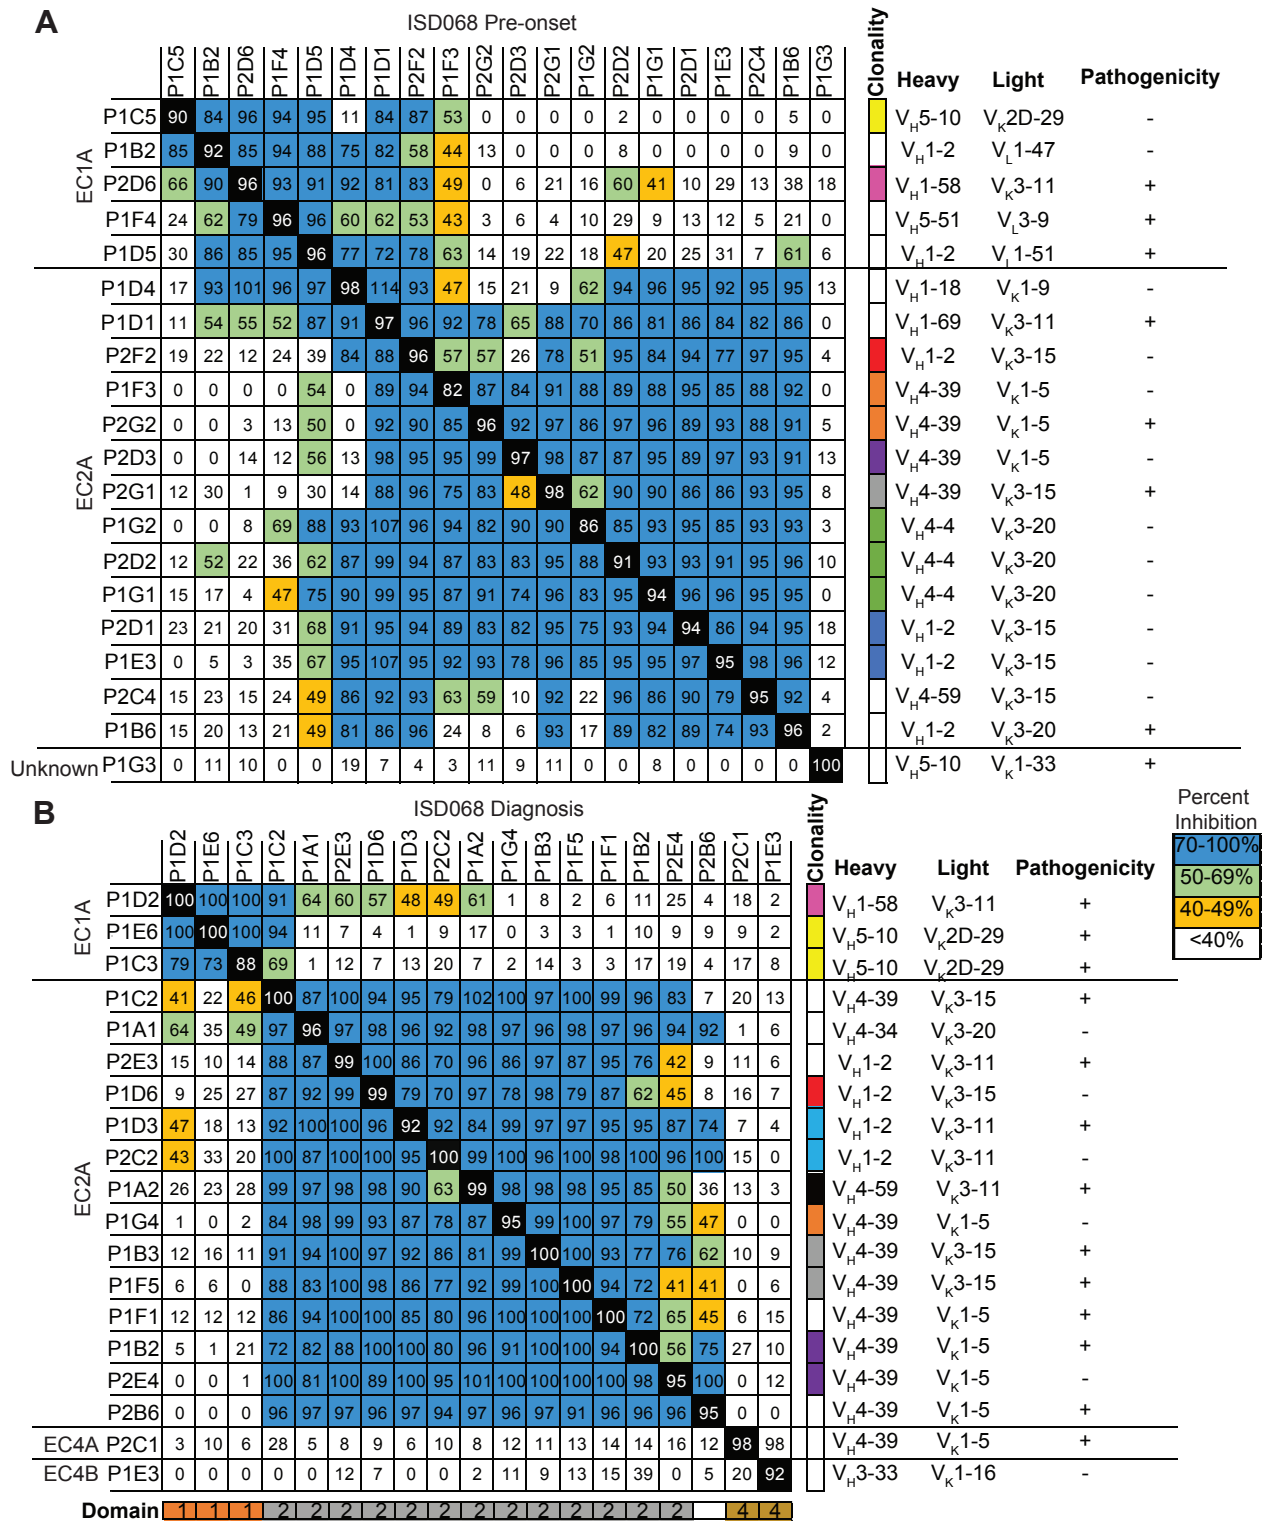

**Figure S7. Related to Figure 5. Similar sterically-distinct epitopes are detected at pre-onset and diagnosis time points.** A flow-based blocking assay was used to detect sterically-distinct epitopes of antibodies from patient ISD068 derived from (A) pre-onset and (B) diagnosis time points. Similar frequencies of EC1A and EC2A epitopes could be detected at pre-diagnosis, as well as diagnosis time point, suggesting that no epitope spreading has occurred between the two time points. Designated name of the epitope bound by antibodies is specified on the left of the chart where appropriate. Domain-specificity of mAbs derived from the diagnosis time point is illustrated at the bottom of the chart (Orange: EC1; Grey: EC2; Gold: EC4; White: Interdomain). mAbs in the same clonal family are represented on the right of the chart. VH and VL usage and pathogenicity are listed on the right of the panel. Pathogenicity was determined by using the following cut-off values of the dissociation index number: - =  $DI \leq 10$ ; + =  $10 < DI \leq 100$ .



**TABLE S1. Related to Figure 1. Characteristics of subjects at time of enrollment**

| GROUP                                                         | Patient ID                       | Gender          | Age              | Disease                     | % B cells of lymphocytes | Medications (mg/d)            | Mo. Post recent Rtx | No. of previous Rtx | PDAI <sup>a</sup> | Dsg3 Titer <sup>c</sup> | Dsg1 titer <sup>d</sup> |
|---------------------------------------------------------------|----------------------------------|-----------------|------------------|-----------------------------|--------------------------|-------------------------------|---------------------|---------------------|-------------------|-------------------------|-------------------------|
| PV patients<br>DIAGNOSIS<br>(n=17)                            | ISD001                           | M               | 48               | mucocutaneous               | 10.9                     | Prednisone (30)               |                     |                     | 12                | 20                      | 133                     |
|                                                               | ISD003                           | M               | 26               | mucosal                     | 8.2                      | Prednisone (20)               |                     |                     | 11                | 137                     | neg                     |
|                                                               | ISD020                           | M               | 48               | mucocutaneous               | 6.3                      | Prednisone (60)               |                     |                     | 15                | 69                      | 169                     |
|                                                               | ISD058                           | F               | 43               | mucosal                     | 15.8                     | Prednisone (30)               |                     |                     | 15                | 50                      | neg                     |
|                                                               | ISD061                           | F               | 54               | mucosal                     | 8.8                      | Prednisone (60)               |                     |                     | 6                 | 191                     | neg                     |
|                                                               | ISD066                           | M               | 52               | mucocutaneous               | 1.8                      | Prednisone (30)               |                     |                     | 36                | 181                     | 199                     |
|                                                               | <b><i>ISD068<sup>f</sup></i></b> | <b><i>M</i></b> | <b><i>60</i></b> | <b><i>mucocutaneous</i></b> | <b><i>4.3</i></b>        | <b><i>Prednisone (40)</i></b> |                     |                     | <b><i>8</i></b>   | <b><i>195</i></b>       | <b><i>neg</i></b>       |
|                                                               | ISD069                           | M               | 38               | mucocutaneous               | 13.7                     | Prednisone (30)               |                     |                     | 55                | 204                     | neg                     |
|                                                               | ISD070                           | M               | 48               | mucocutaneous               | 11.8                     | None                          |                     |                     | 0                 | 200                     | 117                     |
|                                                               | ISD082                           | M               | 54               | mucocutaneous               | 9.4                      | Prednisone (80)               |                     |                     | 5                 | 49                      | 38                      |
|                                                               | ISD086                           | F               | 31               | mucocutaneous               | 10.0                     | Prednisone (60)               |                     |                     | 4                 | 128                     | neg                     |
|                                                               | ISD091                           | F               | 45               | mucocutaneous               | 5.7                      | Prednisone (60)               |                     |                     | 64                | 153                     | 171                     |
|                                                               | ISD100                           | M               | 60               | mucocutaneous               | 10.1                     | Prednisone (20)               |                     |                     | 20                | 169                     | neg                     |
|                                                               | <b><i>ISD102<sup>f</sup></i></b> | <b><i>F</i></b> | <b><i>45</i></b> | <b><i>mucocutaneous</i></b> | <b><i>6.5</i></b>        | <b><i>Prednisone (10)</i></b> |                     |                     | <b><i>36</i></b>  | <b><i>200</i></b>       | <b><i>neg</i></b>       |
|                                                               | ISD106                           | F               | 51               | mucocutaneous               | 11.5                     | Prednisone (20)               |                     |                     | 4                 | 75                      | neg                     |
| ISD109                                                        | F                                | 48              | mucocutaneous    | 6.8                         | Prednisone (80)          |                               |                     | 20                  | 166               | 38                      |                         |
| ISD112                                                        | M                                | 42              | mucocutaneous    | 7.5                         | Data unavailable         |                               |                     | 30 <sup>b</sup>     | 151               | 164                     |                         |
| PV patients<br>REMISSION <sup>e</sup><br>(post-Rtx)<br>(n=10) | R15                              | F               | 45               | mucosal                     | 10.8                     | None                          | 20                  | 0                   | 1                 | neg                     | neg                     |
|                                                               | R15-06                           | M               | 41               | mucosal                     | 8.8                      | Cellcept (500)                | 19                  | 2                   | 0                 | 120                     | neg                     |
|                                                               | ISD002                           | F               | 48               | mucosal                     | 2.3                      | None                          | 6                   | 1                   | 0                 | neg                     | neg                     |
|                                                               | ISD025                           | M               | 58               | mucosal                     | 7.8                      | Prednisone (2.5)              | 22                  | 0                   | 0                 | neg                     | neg                     |
|                                                               | ISD060                           | F               | 47               | mucosal                     | 13.2                     | None                          | 17                  | 0                   | 2                 | 24                      | neg                     |
|                                                               | ISD068                           | M               | 63               | mucocutaneous               | 3.2                      | None                          | 11                  | 2                   | 0                 | 29                      | neg                     |
|                                                               | ISD069                           | M               | 39               | mucocutaneous               | 7.6                      | None                          | 13                  | 0                   | 3                 | neg                     | neg                     |
|                                                               | ISD070                           | M               | 51               | mucocutaneous               | 8.2                      | None                          | 29                  | 0                   | 1                 | 135                     | neg                     |
|                                                               | ISD072                           | F               | 51               | mucocutaneous               | 8.9                      | None                          | 12                  | 0                   | 0                 | neg                     | neg                     |
|                                                               | ISD082                           | M               | 55               | mucocutaneous               | 5.5                      | None                          | 13                  | 0                   | 0                 | neg                     | neg                     |
| PV patients<br>RELAPSE <sup>e</sup>                           | ISD005                           | M               | 64               | mucocutaneous               | 3.2                      | Prednisone (40)               | 77                  | 0                   | 12                | 131                     | 98                      |
|                                                               | ISD031                           | M               | 77               | mucocutaneous               | 5.4                      | None                          | 27                  | 1                   | 1                 | neg                     | neg                     |
|                                                               | ISD038                           | M               | 66               | mucocutaneous               | 5.6                      | None                          | 13                  | 0                   | 15                | 112                     | 175                     |

|                                                                         |        |   |    |               |      |      |    |   |    |     |     |
|-------------------------------------------------------------------------|--------|---|----|---------------|------|------|----|---|----|-----|-----|
| PV patients<br>RELAPSE <sup>e</sup><br>(cont'd)<br>(post-Rtx)<br>(n=17) | ISD060 | F | 48 | mucosal       | 11.9 | None | 22 | 0 | 5  | 43  | neg |
|                                                                         | ISD061 | F | 55 | mucosal       | 5.5  | None | 11 | 0 | 0  | 34  | neg |
|                                                                         | ISD063 | F | 61 | mucocutaneous | 10.6 | None | 8  | 0 | 12 | 149 | neg |
|                                                                         | ISD068 | M | 62 | mucocutaneous | 3.1  | None | 13 | 1 | 2  | 73  | neg |
|                                                                         | ISD069 | M | 41 | mucocutaneous | 16   | None | 20 | 1 | 2  | 45  | neg |
|                                                                         | ISD070 | M | 51 | mucocutaneous | 7.1  | None | 36 | 0 | 7  | 130 | neg |
|                                                                         | ISD072 | F | 52 | mucocutaneous | 13.1 | None | 21 | 1 | 0  | 108 | 187 |
|                                                                         | ISD074 | M | 49 | mucocutaneous | 9.6  | None | 12 | 3 | 15 | 62  | 94  |
|                                                                         | ISD084 | F | 50 | mucocutaneous | 4.3  | None | 9  | 0 | 3  | neg | neg |
|                                                                         | ISD086 | F | 32 | mucocutaneous | 9.3  | None | 17 | 0 | 3  | 159 | 67  |
|                                                                         | ISD104 | F | 50 | mucosal       | 37.2 | None | 10 | 0 | 22 | 57  | neg |
|                                                                         | ISD106 | F | 51 | mucocutaneous | 7.33 | None | 8  | 0 | 4  | 47  | neg |
|                                                                         | ISD110 | M | 37 | mucocutaneous | 14.4 | None | 20 | 0 | 2  | 37  | neg |
|                                                                         | ISD122 | M | 63 | mucocutaneous | 3.7  | None | 45 | 4 | 25 | 78  | neg |
| Healthy<br>controls<br>(n=11)                                           | HC01   | F | 48 |               | 11.3 |      |    |   |    |     |     |
|                                                                         | HC02   | F | 53 |               | 12.3 |      |    |   |    |     |     |
|                                                                         | HC08   | F | 57 |               | 8.7  |      |    |   |    |     |     |
|                                                                         | HC13   | M | 40 |               | 4.1  |      |    |   |    |     |     |
|                                                                         | HC15   | F | 31 |               | 11.5 |      |    |   |    |     |     |
|                                                                         | H15-08 | F | 45 |               | 4.9  |      |    |   |    |     |     |
|                                                                         | H15-11 | F | 45 |               | 6.6  |      |    |   |    |     |     |
|                                                                         | H15-13 | F | 46 |               | 14.9 |      |    |   |    |     |     |
|                                                                         | HC421  | F | 25 |               | 5.6  |      |    |   |    |     |     |
|                                                                         | HC435  | F | 27 |               | 9.5  |      |    |   |    |     |     |
|                                                                         | HC467  | M | 37 |               | 10.0 |      |    |   |    |     |     |

<sup>a</sup>Pemphigus Disease Activity Index (According to: Rosenbach M, et al. Reliability and convergent validity of two outcome instruments for pemphigus. *The Journal of investigative dermatology*. 2009;129(10):2404-10.

<sup>b</sup>PDAI score calculated from photos

<sup>c</sup>Dsg3 titers reported in U/mL. Cut-off values determined by manufacturer recommendation: neg (negative) < 19

<sup>d</sup>Dsg1 titers reported in U/mL. Cut-off values determined by manufacturer recommendation: neg (negative) < 18

<sup>e</sup>According to Rosenbach M, et al. Reliability and convergent validity of two outcome instruments for pemphigus. *The Journal of investigative dermatology*. 2009;129(10):2404-10.

<sup>f</sup>Patient ISD068 and ISD102 are highlighted as patients of interest; Dsg3-specific mAbs are derived and characterized from these two patients.

**TABLE S2. Related to Figure 2. Repertoire analysis of Dsg3-specific mAbs isolated from two PV patients.**

| Patient                       | mAb <sup>a</sup>  | Isotype             | Heavy Chain         |                  | CDR3 length (nt) | # Mutations (R/S ratio) | Light Chain         |                      |                  | CDR3 length (nt) | # Mutations (R/S ratio) |
|-------------------------------|-------------------|---------------------|---------------------|------------------|------------------|-------------------------|---------------------|----------------------|------------------|------------------|-------------------------|
|                               |                   |                     | V gene              | J gene           |                  |                         | K/L                 | V gene               | J gene           |                  |                         |
| ISD102<br>Diagnosis<br>(n=20) | P3F3              | IgG1                | V <sub>H</sub> 1-46 | J <sub>H</sub> 3 | 54               | 23 (19/4)               | Kappa               | V <sub>K</sub> 2-24  | J <sub>K</sub> 5 | 27               | 8 (7/1)                 |
|                               | P5D5              | IgG1                | V <sub>H</sub> 1-46 | J <sub>H</sub> 2 | 27               | 25 (20/5)               | Kappa               | V <sub>K</sub> 2-24  | J <sub>K</sub> 2 | 27               | 14 (10/4)               |
|                               | P5F5 <sup>+</sup> | IgA1                | V <sub>H</sub> 3-15 | J <sub>H</sub> 4 | 54               | 18 (11/7)               | Lambda              | V <sub>L</sub> 6-57  | J <sub>L</sub> 3 | 30               | 18 (15/3)               |
|                               | P5F4 <sup>+</sup> | IgA1                | V <sub>H</sub> 3-15 | J <sub>H</sub> 4 | 54               | 22 (14/8)               | Lambda              | V <sub>L</sub> 6-57  | J <sub>L</sub> 3 | 30               | 19 (16/3)               |
|                               | P5B3 <sup>-</sup> | IgG1                | V <sub>H</sub> 3-15 | J <sub>H</sub> 4 | 54               | 20 (13/7)               | Lambda              | V <sub>L</sub> 3-10  | J <sub>L</sub> 3 | 33               | 17 (12/5)               |
|                               | P5C3 <sup>-</sup> | IgG1                | V <sub>H</sub> 3-15 | J <sub>H</sub> 4 | 54               | 26 (15/11)              | Lambda              | V <sub>L</sub> 3-10  | J <sub>L</sub> 3 | 33               | 20 (15/5)               |
|                               | P5A6 <sup>δ</sup> | IgG1                | V <sub>H</sub> 1-46 | J <sub>H</sub> 3 | 45               | 14 (9/5)                | Kappa               | V <sub>K</sub> 2-24  | J <sub>K</sub> 5 | 27               | 13 (8/5)                |
|                               | P5G3 <sup>δ</sup> | IgG1                | V <sub>H</sub> 1-46 | J <sub>H</sub> 3 | 45               | 18 (13/5)               | Kappa               | V <sub>K</sub> 2-24  | J <sub>K</sub> 5 | 27               | 12 (9/3)                |
|                               | P5B1              | IgG1                | V <sub>H</sub> 1-46 | J <sub>H</sub> 6 | 54               | 24 (14/10)              | Kappa               | V <sub>K</sub> 2-24  | J <sub>K</sub> 1 | 27               | 7 (4/3)                 |
|                               | P4D4 <sup>β</sup> | IgG1                | V <sub>H</sub> 3-23 | J <sub>H</sub> 1 | 57               | 19 (14/5)               | Lambda              | V <sub>L</sub> 3-21  | J <sub>L</sub> 3 | 33               | 21 (15/7)               |
|                               | P5G4 <sup>β</sup> | IgG1                | V <sub>H</sub> 3-23 | J <sub>H</sub> 1 | 57               | 15 (10/5)               | Lambda              | V <sub>L</sub> 3-21  | J <sub>L</sub> 3 | 33               | 16 (15/1)               |
|                               | P5D1 <sup>β</sup> | IgG1                | V <sub>H</sub> 3-23 | J <sub>H</sub> 1 | 57               | 17 (11/6)               | Lambda              | V <sub>L</sub> 3-21  | J <sub>L</sub> 3 | 33               | 21 (17/4)               |
|                               | P5A2              | IgG1                | V <sub>H</sub> 3-53 | J <sub>H</sub> 4 | 45               | 6 (4/2)                 | Lambda              | V <sub>L</sub> 1-40  | J <sub>L</sub> 3 | 33               | 12 (10/2)               |
|                               | P5G6              | IgG1                | V <sub>H</sub> 1-2  | J <sub>H</sub> 4 | 42               | 27 (20/7)               | Lambda              | V <sub>L</sub> 3-21  | J <sub>L</sub> 2 | 36               | 12 (11/1)               |
|                               | P5E4 <sup>Ω</sup> | IgG1                | V <sub>H</sub> 4-61 | J <sub>H</sub> 4 | 36               | 19 (11/8)               | Lambda              | V <sub>L</sub> 6-57  | J <sub>L</sub> 3 | 30               | 14 (11/3)               |
|                               | P5B6 <sup>Ω</sup> | IgG1                | V <sub>H</sub> 4-61 | J <sub>H</sub> 4 | 36               | 15 (9/6)                | Lambda              | V <sub>L</sub> 6-57  | J <sub>L</sub> 3 | 30               | 12 (9/3)                |
|                               | P5D4              | IgG1                | V <sub>H</sub> 3-66 | J <sub>H</sub> 4 | 33               | 18 (17/1)               | Kappa               | V <sub>K</sub> 1-5   | J <sub>K</sub> 2 | 27               | 5 (4/1)                 |
|                               | P3A6              | IgG1                | V <sub>H</sub> 1-69 | J <sub>H</sub> 3 | 54               | 30 (23/7)               | Kappa               | V <sub>K</sub> 3-15  | J <sub>K</sub> 2 | 30               | 11 (9/2)                |
| P5C2                          | IgG1              | V <sub>H</sub> 4-4  | J <sub>H</sub> 4    | 42               | 17 (11/6)        | Kappa                   | V <sub>K</sub> 3-11 | J <sub>K</sub> 4     | 27               | 2 (2/0)          |                         |
| P5A4                          | IgM               | V <sub>H</sub> 1-2  | J <sub>H</sub> 4    | 57               | 0                | Kappa                   | V <sub>K</sub> 3-20 | J <sub>K</sub> 1     | 27               | 0                |                         |
| ISD068<br>Diagnosis<br>(n=25) | P1E6 <sup>*</sup> | IgG4                | V <sub>H</sub> 5-10 | J <sub>H</sub> 4 | 48               | 18 (14/4)               | Kappa               | V <sub>K</sub> 2D-29 | J <sub>K</sub> 4 | 27               | 14 (9/5)                |
|                               | P1C3 <sup>*</sup> | IgG4                | V <sub>H</sub> 5-10 | J <sub>H</sub> 4 | 48               | 24 (21/3)               | Kappa               | V <sub>K</sub> 2D-29 | J <sub>K</sub> 4 | 27               | 19 (9/10)               |
|                               | P1D2 <sup>‡</sup> | IgG1                | V <sub>H</sub> 1-58 | J <sub>H</sub> 3 | 33               | 24 (20/4)               | Kappa               | V <sub>K</sub> 3-11  | J <sub>K</sub> 2 | 30               | 12 (9/3)                |
|                               | P1A1              | IgG4                | V <sub>H</sub> 4-34 | J <sub>H</sub> 4 | 69               | 27 (25/12)              | Kappa               | V <sub>K</sub> 3-20  | J <sub>K</sub> 2 | 27               | 13 (11/2)               |
|                               | P1C5              | IgG1                | V <sub>H</sub> 4-59 | J <sub>H</sub> 4 | 60               | 39 (31/8)               | Kappa               | V <sub>K</sub> 3-15  | J <sub>K</sub> 1 | 30               | 11 (8/3)                |
|                               | P1C6              | IgG1                | V <sub>H</sub> 3-23 | J <sub>H</sub> 3 | 63               | 26 (19/7)               | Kappa               | V <sub>K</sub> 4-1   | J <sub>K</sub> 5 | 27               | 16 (10/6)               |
|                               | P1F1              | IgG1                | V <sub>H</sub> 4-39 | J <sub>H</sub> 2 | 42               | 29 (21/8)               | Kappa               | V <sub>K</sub> 1-5   | J <sub>K</sub> 1 | 27               | 26 (19/7)               |
|                               | P1B3 <sup>#</sup> | IgG4                | V <sub>H</sub> 4-39 | J <sub>H</sub> 2 | 84               | 43 (28/15)              | Kappa               | V <sub>K</sub> 3-15  | J <sub>K</sub> 2 | 33               | 18 (10/8)               |
|                               | P1F5 <sup>#</sup> | IgG1                | V <sub>H</sub> 4-39 | J <sub>H</sub> 2 | 84               | 29 (17/12)              | Kappa               | V <sub>K</sub> 3-15  | J <sub>K</sub> 2 | 33               | 20 (16/4)               |
|                               | P1D6 <sup>†</sup> | IgG4                | V <sub>H</sub> 1-2  | J <sub>H</sub> 1 | 30               | 22 (14/8)               | Kappa               | V <sub>K</sub> 3-15  | J <sub>K</sub> 1 | 33               | 16 (12/4)               |
|                               | P2E3              | IgG4                | V <sub>H</sub> 1-2  | J <sub>H</sub> 4 | 30               | 20 (15/5)               | Kappa               | V <sub>K</sub> 3-11  | J <sub>K</sub> 2 | 33               | 15 (11/4)               |
|                               | P1G4              | IgG1                | V <sub>H</sub> 4-39 | J <sub>H</sub> 2 | 42               | 30 (21/9)               | Kappa               | V <sub>K</sub> 1-5   | J <sub>K</sub> 1 | 27               | 20 (14/6)               |
|                               | P1D3 <sup>^</sup> | IgG1                | V <sub>H</sub> 1-2  | J <sub>H</sub> 4 | 72               | 29 (24/5)               | Kappa               | V <sub>K</sub> 3-11  | J <sub>K</sub> 2 | 33               | 16 (11/5)               |
|                               | P2C2 <sup>^</sup> | IgG1                | V <sub>H</sub> 1-2  | J <sub>H</sub> 4 | 72               | 28 (24/4)               | Kappa               | V <sub>K</sub> 3-11  | J <sub>K</sub> 2 | 33               | 21 (17/4)               |
| P1B2 <sup>%</sup>             | IgG1              | V <sub>H</sub> 4-39 | J <sub>H</sub> 2    | 63               | 21 (16/5)        | Kappa                   | V <sub>K</sub> 1-5  | J <sub>K</sub> 1     | 27               | 20 (14/6)        |                         |

|                                       |                       |      |                     |                  |    |            |        |                      |                  |    |            |
|---------------------------------------|-----------------------|------|---------------------|------------------|----|------------|--------|----------------------|------------------|----|------------|
|                                       | P2E4 <sup>%</sup>     | IgG1 | V <sub>H</sub> 4-39 | J <sub>H</sub> 2 | 63 | 21 (15/6)  | Kappa  | V <sub>K</sub> 1-5   | J <sub>K</sub> 1 | 27 | 20 (12/8)  |
|                                       | P1C2                  | IgG4 | V <sub>H</sub> 4-39 | J <sub>H</sub> 5 | 39 | 30 (19/11) | Kappa  | V <sub>K</sub> 3-15  | J <sub>K</sub> 2 | 33 | 15 (13/2)  |
|                                       | P1A2 <sup>‡</sup>     | IgG1 | V <sub>H</sub> 4-59 | J <sub>H</sub> 2 | 48 | 29 (20/9)  | Kappa  | V <sub>K</sub> 3-11  | J <sub>K</sub> 2 | 18 | 15 (11/4)  |
|                                       | P2C1                  | IgG1 | V <sub>H</sub> 4-39 | J <sub>H</sub> 4 | 48 | 27 (17/10) | Kappa  | V <sub>K</sub> 1-5   | J <sub>K</sub> 1 | 21 | 13 (9/4)   |
|                                       | P2B6                  | IgG1 | V <sub>H</sub> 4-39 | J <sub>H</sub> 4 | 42 | 27 (19/8)  | Kappa  | V <sub>K</sub> 1-5   | J <sub>K</sub> 1 | 27 | 20 (14/6)  |
|                                       | P1E4 <sup>&amp;</sup> | IgG1 | V <sub>H</sub> 4-4  | J <sub>H</sub> 5 | 45 | 28 (23/5)  | Kappa  | V <sub>K</sub> 3-15  | J <sub>K</sub> 3 | 30 | 15 (9/6)   |
|                                       | P1B5 <sup>&amp;</sup> | IgG1 | V <sub>H</sub> 4-4  | J <sub>H</sub> 5 | 45 | 36 (28/8)  | Kappa  | V <sub>K</sub> 3-15  | J <sub>K</sub> 3 | 30 | 12 (7/5)   |
|                                       | P1A5                  | IgG1 | V <sub>H</sub> 3-23 | J <sub>H</sub> 4 | 39 | 0          | Lambda | V <sub>L</sub> 1-47  | J <sub>L</sub> 2 | 33 | 0          |
|                                       | P1G1                  | IgA1 | V <sub>H</sub> 3-74 | J <sub>H</sub> 3 | 51 | 19 (14/5)  | Kappa  | V <sub>K</sub> 3-15  | J <sub>K</sub> 3 | 27 | 11 (10/1)  |
|                                       | P1E3                  | IgG4 | V <sub>H</sub> 3-33 | J <sub>H</sub> 3 | 60 | 7 (5/2)    | Kappa  | V <sub>K</sub> 1-16  | J <sub>K</sub> 4 | 27 | 6 (3/3)    |
| ISD068<br>Pre-<br>Diagnosis<br>(n=25) | P1D4                  | IgG4 | V <sub>H</sub> 1-18 | J <sub>H</sub> 4 | 42 | 16 (11/5)  | Kappa  | V <sub>K</sub> 1-9   | J <sub>K</sub> 4 | 27 | 8 (7/1)    |
|                                       | P2F2 <sup>†</sup>     | IgG4 | V <sub>H</sub> 1-2  | J <sub>H</sub> 1 | 30 | 25 (18/7)  | Kappa  | V <sub>K</sub> 3-15  | J <sub>K</sub> 1 | 33 | 17 (13/4)  |
|                                       | P1D5                  | IgG4 | V <sub>H</sub> 1-2  | J <sub>H</sub> 3 | 48 | 23 (14/9)  | Lambda | V <sub>L</sub> 1-51  | J <sub>L</sub> 3 | 36 | 8 (5/3)    |
|                                       | P1D6                  | IgG1 | V <sub>H</sub> 1-2  | J <sub>H</sub> 3 | 27 | 31 (18/13) | Kappa  | V <sub>K</sub> 3-11  | J <sub>K</sub> 5 | 33 | 13 (8/5)   |
|                                       | P1B2                  | IgG1 | V <sub>H</sub> 1-2  | J <sub>H</sub> 4 | 42 | 36 (25/11) | Lambda | V <sub>L</sub> 1-47  | J <sub>L</sub> 1 | 33 | 21 (10/11) |
|                                       | P1B6                  | IgG4 | V <sub>H</sub> 1-2  | J <sub>H</sub> 4 | 24 | 16 (10/6)  | Kappa  | V <sub>K</sub> 3-20  | J <sub>K</sub> 4 | 27 | 12 (10/2)  |
|                                       | P2D1 <sup>^</sup>     | IgG1 | V <sub>H</sub> 1-2  | J <sub>H</sub> 4 | 39 | 22 (17/5)  | Kappa  | V <sub>K</sub> 3-15  | J <sub>K</sub> 4 | 33 | 15 (12/3)  |
|                                       | P1E3 <sup>^</sup>     | IgG4 | V <sub>H</sub> 1-2  | J <sub>H</sub> 4 | 39 | 17 (15/2)  | Kappa  | V <sub>K</sub> 3-15  | J <sub>K</sub> 4 | 33 | 12 (10/2)  |
|                                       | P1G5 <sup>^</sup>     | IgG4 | V <sub>H</sub> 1-2  | J <sub>H</sub> 4 | 39 | 24 (14/10) | Kappa  | V <sub>K</sub> 3-15  | J <sub>K</sub> 4 | 33 | 12 (10/2)  |
|                                       | P2D6 <sup>‡</sup>     | IgG4 | V <sub>H</sub> 1-58 | J <sub>H</sub> 3 | 33 | 10 (9/1)   | Kappa  | V <sub>K</sub> 3-11  | J <sub>K</sub> 2 | 30 | 8 (6/2)    |
|                                       | P1D1                  | IgG1 | V <sub>H</sub> 1-69 | J <sub>H</sub> 5 | 54 | 28 (22/6)  | Kappa  | V <sub>K</sub> 3-11  | J <sub>K</sub> 4 | 30 | 5 (4/1)    |
|                                       | P1C4                  | IgM  | V <sub>H</sub> 3-23 | J <sub>H</sub> 1 | 54 | 3 (1/2)    | Lambda | V <sub>L</sub> 3-25  | J <sub>L</sub> 2 | 33 | 10 (7/3)   |
|                                       | P2F4                  | IgG4 | V <sub>H</sub> 3-53 | J <sub>H</sub> 6 | 42 | 31 (26/5)  | Kappa  | V <sub>K</sub> 1-5   | J <sub>K</sub> 1 | 27 | 15 (10/5)  |
|                                       | P1G1 <sup>§</sup>     | IgG1 | V <sub>H</sub> 4-4  | J <sub>H</sub> 2 | 72 | 35 (26/9)  | Kappa  | V <sub>K</sub> 3-20  | J <sub>K</sub> 4 | 30 | 18 (14/4)  |
|                                       | P1G2 <sup>§</sup>     | IgG1 | V <sub>H</sub> 4-4  | J <sub>H</sub> 2 | 72 | 36 (27/9)  | Kappa  | V <sub>K</sub> 3-20  | J <sub>K</sub> 4 | 30 | 14 (12/2)  |
|                                       | P2D2 <sup>§</sup>     | IgG1 | V <sub>H</sub> 4-4  | J <sub>H</sub> 2 | 72 | 38 (28/10) | Kappa  | V <sub>K</sub> 3-20  | J <sub>K</sub> 4 | 30 | 16 (13/3)  |
|                                       | P2D3 <sup>%</sup>     | IgA1 | V <sub>H</sub> 4-39 | J <sub>H</sub> 2 | 63 | 15 (11/4)  | Kappa  | V <sub>K</sub> 1-5   | J <sub>K</sub> 1 | 27 | 11 (10/1)  |
|                                       | P2G2 <sup>α</sup>     | IgG1 | V <sub>H</sub> 4-39 | J <sub>H</sub> 2 | 42 | 21 (11/10) | Kappa  | V <sub>K</sub> 1-5   | J <sub>K</sub> 1 | 27 | 17 (11/6)  |
|                                       | P1F3 <sup>α</sup>     | IgG1 | V <sub>H</sub> 4-39 | J <sub>H</sub> 2 | 42 | 20 (14/6)  | Kappa  | V <sub>K</sub> 1-5   | J <sub>K</sub> 1 | 27 | 15 (10/5)  |
|                                       | P2G1 <sup>#</sup>     | IgG1 | V <sub>H</sub> 4-39 | J <sub>H</sub> 2 | 84 | 23 (15/8)  | Kappa  | V <sub>K</sub> 3-15  | J <sub>K</sub> 2 | 33 | 14 (12/2)  |
|                                       | P2C4                  | IgG1 | V <sub>H</sub> 4-59 | J <sub>H</sub> 4 | 60 | 34 (28/6)  | Kappa  | V <sub>K</sub> 3-15  | J <sub>K</sub> 1 | 30 | 9 (6/3)    |
|                                       | P1D2 <sup>‡</sup>     | IgG1 | V <sub>H</sub> 4-59 | J <sub>H</sub> 2 | 48 | 27 (20/7)  | Kappa  | V <sub>K</sub> 3-11  | J <sub>K</sub> 2 | 18 | 16 (11/5)  |
|                                       | P1C5 <sup>*</sup>     | IgG4 | V <sub>H</sub> 5-10 | J <sub>H</sub> 4 | 48 | 14 (10/4)  | Kappa  | V <sub>K</sub> 2D-29 | J <sub>K</sub> 4 | 27 | 11 (5/6)   |
|                                       | P1G3                  | IgG1 | V <sub>H</sub> 5-10 | J <sub>H</sub> 3 | 51 | 21 (18/3)  | Kappa  | V <sub>K</sub> 1-33  | J <sub>K</sub> 2 | 27 | 19 (15/4)  |
|                                       | P1F4                  | IgG4 | V <sub>H</sub> 5-51 | J <sub>H</sub> 5 | 75 | 23 (20/3)  | Lambda | V <sub>L</sub> 3-9   | J <sub>L</sub> 3 | 30 | 18 (9/9)   |

<sup>a</sup> Matching symbols indicate mAbs that are part of the same clonal expansion.

**TABLE S3. Related to Figure 6. Characteristics of antibodies selected for germline reversion.**

| Patient       | mAb    | Isotype | Heavy Chain |        | CDR3 length (nt) | R/S Ratio |      |      | # unique clones | Epitope    | Pathogenicity <sup>a</sup> |
|---------------|--------|---------|-------------|--------|------------------|-----------|------|------|-----------------|------------|----------------------------|
|               |        |         | V gene      | J gene |                  | VH        | FR   | CDR  |                 |            |                            |
| ISD068 (n=10) | P1C3   | IgG4    | VH5-10      | JH4    | 48               | 7         | 4    | 9    | 2               | EC1A       | +                          |
|               |        | Kappa   | VK2D-29     | JK4    | 27               |           |      |      |                 |            |                            |
|               | P1D2   | IgG1    | VH1-58      | JH3    | 33               | 5         | 4.33 | 6    | 2               | EC1A       | +                          |
|               |        | Kappa   | VK3-11      | JK2    | 30               |           |      |      |                 |            |                            |
|               | P1A1   | IgG4    | VH4-34      | JH4    | 69               | 1.25      | 1.56 | 1.67 | 1               | EC2A       | -                          |
|               |        | Kappa   | VK3-20      | JK2    | 27               |           |      |      |                 |            |                            |
|               | P1B2   | IgG1    | VH4-39      | JH2    | 42               | 3.2       | 3    | 5    | 3               | EC2A       | +                          |
|               |        | Kappa   | VK1-5       | JK1    | 27               |           |      |      |                 |            |                            |
|               | P1B3   | IgG4    | VH4-39      | JH2    | 84               | 1.87      | 1.1  | 6.5  | 2               | EC2A       | +                          |
|               |        | Kappa   | VK3-14      | JK2    | 33               |           |      |      |                 |            |                            |
|               | P1D6   | IgG4    | VH1-2       | JH1    | 30               | 1.75      | 1.67 | 2    | 1               | EC2A       | -                          |
|               |        | Kappa   | VK3-15      | JK1    | 33               |           |      |      |                 |            |                            |
|               | P1F1   | IgG1    | VH4-39      | JH2    | 42               | 2.63      | 2.71 | 4    | 3               | EC2A       | +                          |
|               |        | Kappa   | VK1-5       | JK1    | 27               |           |      |      |                 |            |                            |
|               | P2E3   | IgG4    | VH1-2       | JH4    | 30               | 3         | 2.25 | 6    | 1               | EC2A       | +                          |
|               |        | Kappa   | VK3-11      | JK2    | 33               |           |      |      |                 |            |                            |
|               | P2C1   | IgG1    | VH4-39      | JH4    | 48               | 1.7       | 0.55 | 9    | 1               | EC4A       | +                          |
|               |        | Kappa   | VK1-5       | JK1    | 21               |           |      |      |                 |            |                            |
| P1E3          | IgG4   | VH3-33  | JH3         | 60     | 2.5              | 4         | 1    | 1    | EC4B            | -          |                            |
|               | Kappa  | VK1-16  | JK4         | 27     |                  |           |      |      |                 |            |                            |
| ISD102 (n=10) | P3F3   | IgG1    | VH1-46      | JH3    | 54               | 4.75      | 2.75 | 7    | 1               | EC1A       | ++                         |
|               |        | Kappa   | VK2-24      | JK5    | 27               |           |      |      |                 |            |                            |
|               | P5A2   | IgG1    | VH3-53      | JH4    | 45               | 2         | 2    | 2    | 2               | EC1A       | -                          |
|               |        | Lambda  | VL1-40      | JL3    | 33               |           |      |      |                 |            |                            |
|               | P5B1   | IgG1    | VH1-46      | JH6    | 54               | 1.86      | 1.57 | 1    | 1               | EC1A       | ++                         |
|               |        | Kappa   | VK2-24      | JK4    | 27               |           |      |      |                 |            |                            |
|               | P5G3   | IgG1    | VH1-46      | JH3    | 45               | 2.60      | 2.75 | 6    | 2               | EC1A       | ++                         |
|               |        | Kappa   | VK2-24      | JK5    | 27               |           |      |      |                 |            |                            |
|               | P5G6   | IgG1    | VH1-2       | JH4    | 42               | 2.86      | 1.25 | 8    | 1               | EC1 domain | -                          |
|               |        | Lambda  | VL3-21      | JL2    | 36               |           |      |      |                 |            |                            |
|               | P5B3   | IgG1    | VH3-15      | JH4    | 54               | 1.86      | 0.71 | 6    | 3               | EC1B       | +                          |
|               |        | Lambda  | VL3-10      | JL3    | 33               |           |      |      |                 |            |                            |
|               | P5F5   | IgA1    | VH3-15      | JH4    | 54               | 1.57      | 1.17 | 4    | 3               | EC1B       | +                          |
|               |        | Lambda  | VL6-57      | JL3    | 30               |           |      |      |                 |            |                            |
|               | P3A6   | IgG1    | VH1-69      | JH3    | 54               | 3.29      | 2.67 | 7    | 1               | EC4B       | -                          |
|               |        | Kappa   | VK3-15      | JK2    | 30               |           |      |      |                 |            |                            |
|               | P5D4   | IgG1    | VH3-66      | JH4    | 33               | 17        | 12   | 5    | 2               | EC4B       | +                          |
|               |        | Kappa   | VK1-5       | JK2    | 27               |           |      |      |                 |            |                            |
| P5E4          | IgG1   | VH4-61  | JH4         | 36     | 1.38             | 1.14      | 1.5  | 2    | EC4B            | -          |                            |
|               | Lambda | VL6-57  | JL3         | 30     |                  |           |      |      |                 |            |                            |

<sup>a</sup> Pathogenicity was determined using the following cut-off values for the dissociation index number: - = DI≤10; + = DI>10; ++ = DI>100.
